# Supplementary material
Source: PubMed Central journal article supplement (PMC4343132)
Supplement: pnas.1424592112.sapp.pdf [file pnas.1424592112.sapp.pdf]

## Supplementary Information for

### Tunable Control of Antibody Immobilization using Electric Field

*Sam Emaminejad<sup>\*,‡,1,2</sup>, Mehdi Javanmard<sup>\*,‡,3</sup>, Chaitanya Gupta<sup>4</sup>, Shuai Chang<sup>4</sup>, Ronald W. Davis<sup>2</sup>,  
and Roger T. Howe<sup>4</sup>*

<sup>1</sup> Department of Electrical Engineering & Computer Sciences, University of California, Berkeley, CA

<sup>2</sup> Stanford Genome Technology Center, Stanford School of Medicine, CA

<sup>3</sup> Department of Electrical and Computer Engineering, Rutgers University, NJ

<sup>4</sup> Department of Electrical Engineering, Stanford University, CA

*<sup>‡</sup>Both Authors Contributed Equally*

The raw data representing the signal intensity in the anti-IgG and IgG assay are tabulated below, for the cases where no electric field was applied across the channel during IgG immobilization ('Control') vs. the cases where electric fields of different strengths were applied during the immobilization step. To account for potential variations in conditions from experiment to experiment, for each assay, the control experiment was run in a parallel channel embedded in the same PDMS chip. Upon performing the assay, multiple images were captured along each microfluidic channel. Image J was used to analyze the captured images and to measure the mean gray value as the signal intensity representing the anti-IgG and IgG bindings in the channel.

**Corresponding Raw Data:**

|                                                       |                |               |               |
|-------------------------------------------------------|----------------|---------------|---------------|
| <b>Experiment 1 (1 V/cm vs. Control)</b>              | <b>Control</b> | <b>1 V/cm</b> |               |
|                                                       | 62.047         | 53.745        |               |
|                                                       | 38.554         | 68.268        |               |
|                                                       | 56.558         | 59.651        |               |
|                                                       | 62.213         | 59.7605       |               |
|                                                       | 57.457         | 64.561        |               |
|                                                       | 71.971         | 48.241        |               |
|                                                       | 61.989         | 66.2605       |               |
|                                                       | 63.197         | 60.522        |               |
|                                                       | 60.47          | 70.236        |               |
| 54.201                                                | 80.1455        |               |               |
| <b>Experiment 2 (4 V/cm vs. Control)</b>              |                |               |               |
| <b>Experiment 2 (4 V/cm vs. Control)</b>              | <b>Control</b> | <b>4 V/cm</b> |               |
|                                                       | 23.158         | 104.5065      |               |
|                                                       | 26.281         | 54.8395       |               |
|                                                       | 21.966         | 54.58         |               |
|                                                       | 38.32          | 44.545        |               |
|                                                       | 26.309         | 42.9715       |               |
|                                                       | 31.4           | 72.1495       |               |
|                                                       | 38.757         | 45.7025       |               |
|                                                       | 40.596         | 55.45         |               |
|                                                       | 24.427         | 53.5385       |               |
|                                                       | 28.086         | 65.3505       |               |
|                                                       | 22.6           | 50.8525       |               |
| <b>Experiment 3 (1 V/cm &amp; 4 V/cm vs. Control)</b> |                |               |               |
| <b>Experiment 3 (1 V/cm &amp; 4 V/cm vs. Control)</b> | <b>Control</b> | <b>1 V/cm</b> | <b>4 V/cm</b> |
|                                                       | 29.48          | 36.095        | 66.955        |
|                                                       | 29.453         | 91.524        | 91.582        |
|                                                       | 35.398         | 89.291        | 82.028        |
|                                                       | 32.242         | 70.493        | 69.167        |
|                                                       | 33.03          | 51.586        | 68.367        |
|                                                       | 34.614         | 43.541        | 53.634        |
|                                                       | 38.598         | 43.913        | 53.4          |
|                                                       | 38.186         | 53.268        | 71.119        |
|                                                       | 44.585         | 42.917        | 52.594        |
| 40.406                                                | 47.792         |               |               |
|                                                       | 78.691         |               |               |
| <b>Experiment 4 (1 V/cm &amp; 4 V/cm vs. Control)</b> |                |               |               |
| <b>Control</b>                                        | <b>1 V/cm</b>  | <b>4 V/cm</b> |               |

|                                                       |                |               |               |
|-------------------------------------------------------|----------------|---------------|---------------|
|                                                       | 16.96          | 20.901        | 22.611        |
|                                                       | 17.066         | 20.344        | 32.566        |
|                                                       | 18.044         | 19.969        | 21.601        |
|                                                       | 22.632         | 21.535        | 42.37         |
|                                                       | 14.917         | 17.386        | 28.549        |
|                                                       | 14.851         | 8.916         | 22.946        |
|                                                       | 8.204          | 26.438        | 20.807        |
|                                                       | 9.375          | 23.21         | 20.254        |
|                                                       | 19.231         | 18.939        | 20.412        |
|                                                       | 8.817          | 25.155        | 33.354        |
|                                                       | 20.647         |               | 28.226        |
| <b>Experiment 5 (4 V/cm &amp; 8 V/cm vs. Control)</b> |                |               |               |
|                                                       | <b>Control</b> | <b>4 V/cm</b> | <b>8 V/cm</b> |
|                                                       | 130.958        | 143.61        | 53.425        |
|                                                       | 25.152         | 70.565        | 255           |
|                                                       | 60.754         | 55.659        | 64.378        |
|                                                       | 81.12          | 157.257       | 64.48         |
|                                                       | 46.306         | 39.123        | 84.597        |
|                                                       | 43.944         | 90.938        | 55.435        |
|                                                       | 46.081         | 85.238        | 68.368        |
|                                                       | 44.399         | 131.933       | 246.839       |
|                                                       | 70.204         | 70.364        | 83.301        |
|                                                       | 192.807        | 62.071        |               |
|                                                       | 43.787         | 150.241       |               |
| <b>Experiment 6 (4 V/cm &amp; 8 V/cm vs. Control)</b> |                |               |               |
|                                                       | <b>Control</b> | <b>4 V/cm</b> | <b>8 V/cm</b> |
|                                                       | 85.9645        | 193.601       | 130.184       |
|                                                       | 74.373         | 97.946        | 78.858        |
|                                                       | 79.608         | 52.011        | 130.92        |
|                                                       | 92.4765        | 120.856       | 104.99        |
|                                                       | 72.015         | 67.721        | 100.002       |
|                                                       | 113.4425       | 61.869        | 80.627        |
|                                                       | 54.3435        | 122.151       | 145.073       |
|                                                       | 95.012         |               | 97.115        |
| <b>Experiment 7 (8 V/cm vs. Control)</b>              |                |               |               |
|                                                       | <b>Control</b> | <b>8 V/cm</b> |               |

|  |   |         |  |
|--|---|---------|--|
|  | 0 | 78.422  |  |
|  | 0 | 42.666  |  |
|  | 0 | 32.268  |  |
|  | 0 | 126.313 |  |
|  | 0 | 48.374  |  |
|  |   | 74.544  |  |
|  |   | 129.273 |  |
|  |   | 49.199  |  |
